# Supplementary material
Source: PubMed Central journal article supplement (PMC3384150)
Supplement: 1204516109_pnas.1204516109_SI.pdf [file 1204516109_pnas.1204516109_SI.pdf]

# Supporting Information

Dragavon et al. 10.1073/pnas.1204516109

## SI Materials and Methods.

**Spectral Acquisition.** A Perkin-Elmer UV/visible dual path spectrometer with a 1-nm slit width and set to a scan rate of 480 nm/min was used to acquire the absorption spectra for the Congo red and whole mouse blood. Each was diluted between 100 and 400 × using physiological saline. Sterile water was used as the reference. For each acquisition, 1 mL of each analyte was added to a 1-mL plastic cuvette with a 1-cm path length.

**Ex Vivo Bioluminescent Imaging.** Three female 6-wk-old BALB/c mice were anesthetized with Ketamine/Xylazine. For each mouse a cardiac puncture was performed to obtain around 1 mL of blood. Prior to the mouse preparation, a glass bottom black 96-well plate was altered so that the base of the plate could rest

evenly onto a 10-cm Petri dish. A piece of black paper that had six 1.5-mm-diameter holes in a 3 × 2 orientation was placed in between the 96-well plate and an agar plate such that the pinholes were properly aligned with the wells of the 96-well plate. Five microliter aliquots of bacteria were then pipetted onto the agar directly aligned with the pinholes and the wells. After having time to settle, 2 μL aliquots of quantum dot (QD) 705 were placed onto the second column of bacteria. The setup was then placed into the IVIS100 at 37°C and bioluminescence confirmed. Then, 50 μL aliquots of blood from each mouse were appropriately distributed and the luminescence observed under the open and QD705 filter sets.

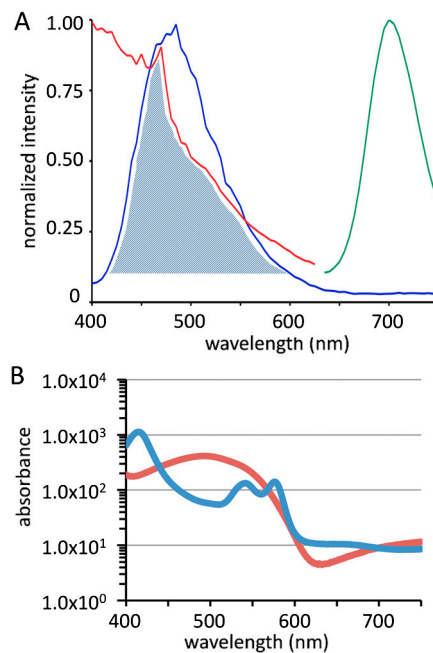

**Fig. S1.** Spectral information relevant to conditions for fluorescence by unbound excitation from luminescence (FUEL). Emission properties for RT57 (pUC18-mini-Tn7T-Gm-lux) bioluminescence (blue line) were compared against the excitation (red line) and emission (green line) spectra of QD705 (A). Data are normalized to their respective maxima. The spectral overlap is indicated (shaded in gray). B shows the absorption spectra for mouse whole blood (MWB; blue line) and Congo red (CR; red line). Note how the spectral profiles of MWB and CR are closely aligned and display a sharp diminution at 600–630 nm, consistent with characteristics for strong absorption of blue light and weak absorption for red light.
